# Supplementary material for: Manipulation of Spray-Drying Conditions to Develop an Inhalable Ivermectin Dry Powder
Source: MDPI journal article supplement (doi:10.3390/pharmaceutics14071432), 2022-07-08
Supplement: s1 [file s1]

# Supplementary Materials: Manipulation of Spray-Drying Conditions to Develop an Inhalable Ivermectin Dry Powder

Tushar Saha<sup>1</sup>, Shubhra Sinha<sup>2</sup>, Rhodri Harfoot<sup>2</sup>, Miguel E. Quiñones-Mateu<sup>2,3</sup> and Shyamal C. Das<sup>1\*</sup>

<sup>1</sup> School of Pharmacy, University of Otago, Dunedin 9054, New Zealand.

<sup>2</sup> Department of Microbiology and Immunology, School of Biomedical Sciences, University of Otago, Dunedin 9054, New Zealand.

<sup>3</sup> Webster Centre for Infectious Diseases, University of Otago, Dunedin 9054, New Zealand.

\* Correspondence: shyamal.das@otago.ac.nz; Tel.: +64 3 479 4262

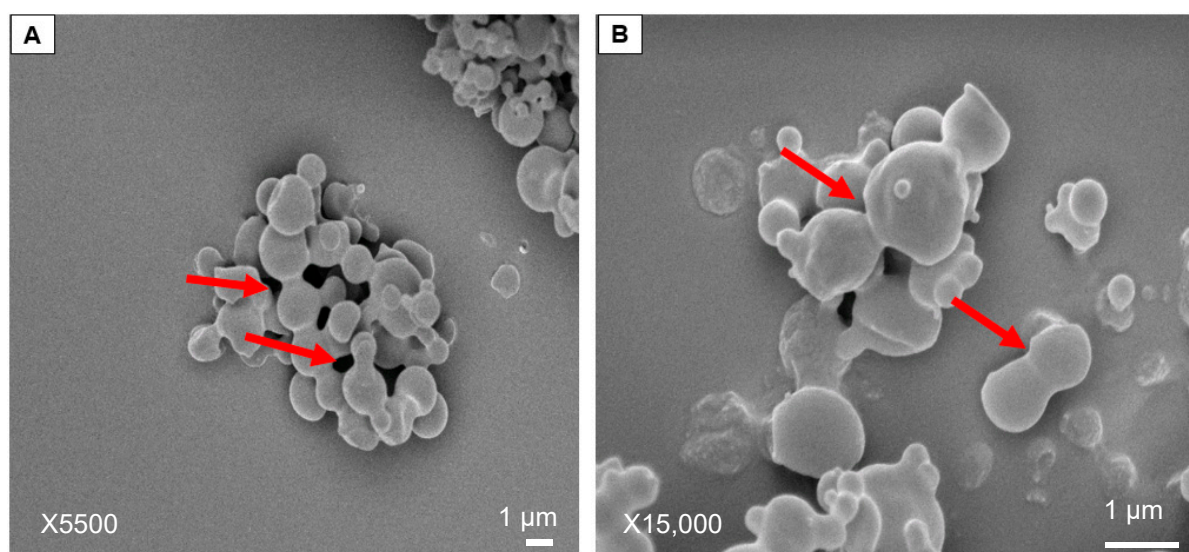

**Figure S1.** Fused ivermectin dry powder after spray drying at (A) 120°C and (B) 140°C. (Arrows indicating the fused particles).

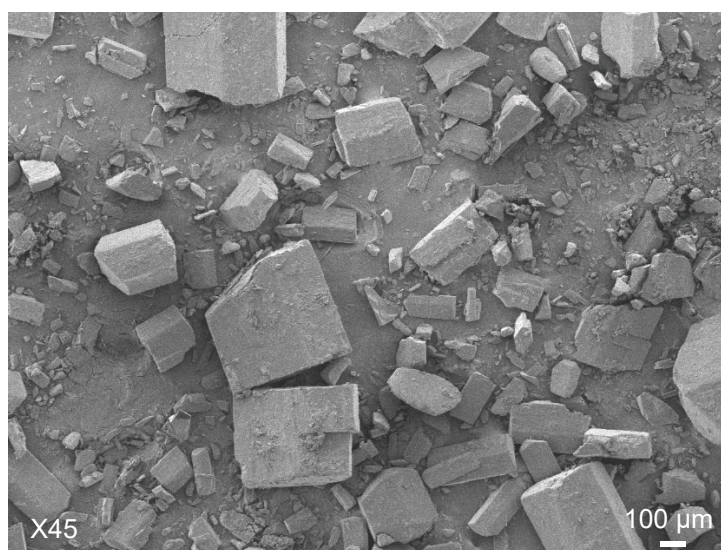

**Figure S2.** Powder morphology of ivermectin raw material.

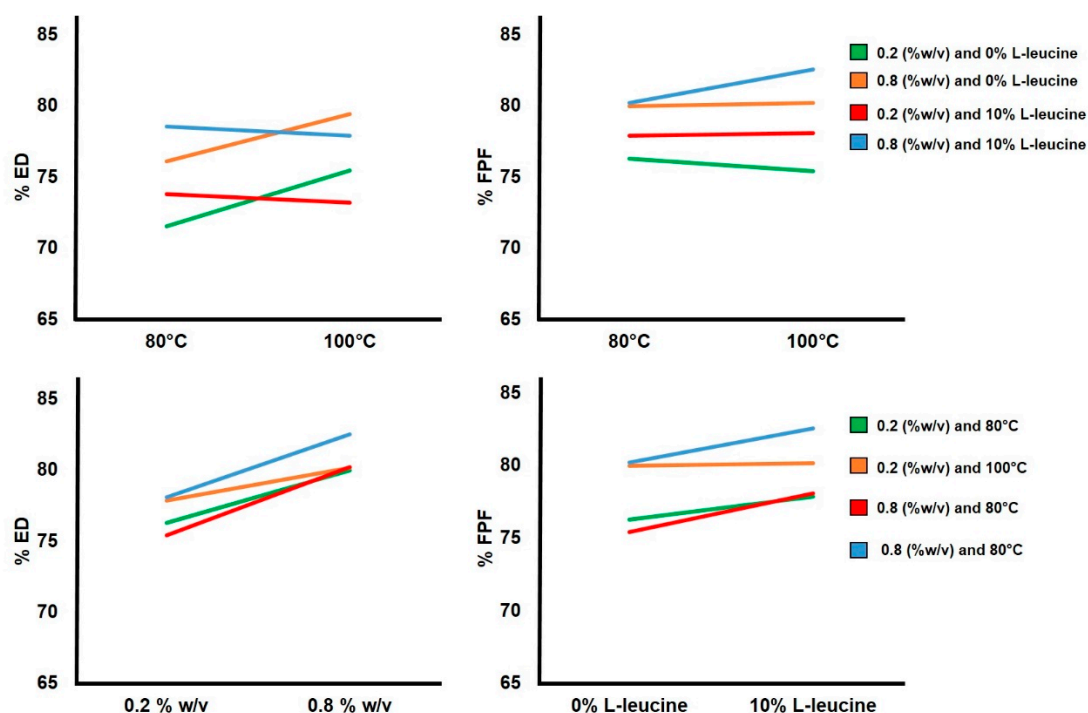

**Figure S3.** Influence of inlet temperature and L-leucine on emitted dose (ED) and fine particle fraction (FPF).

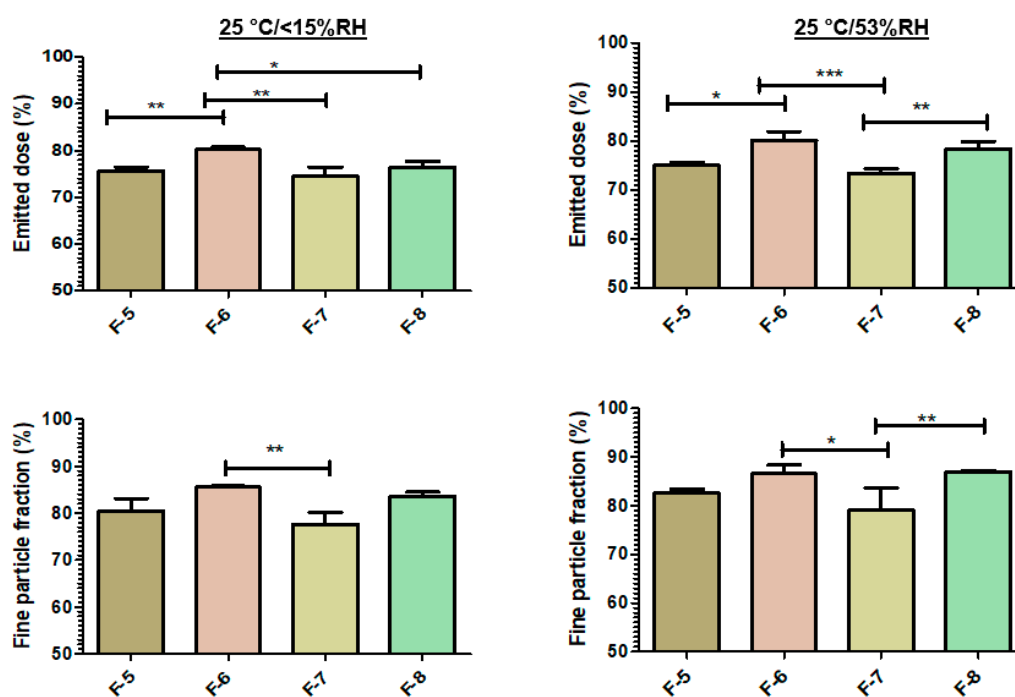

**Figure S4.** In vitro aerosolization of prepared ivermectin dry powder after 28 days stability study (25°C/<15%RH and 25°C/53%RH). The parameters of stated formulations are - (F-5) 0.2% (w/v) feed concentration, 100 °C and 0% L-leucine (F-6) 0.8% (w/v) feed concentration, 100 °C and 0% L-leucine (F-7) 0.2% (w/v) feed concentration, 100 °C and 10% L-leucine (F-8) 0.8% (w/v) feed concentration, 100 °C and 10% L-leucine. (\* indicating  $p < 0.05$ , \*\*  $p < 0.01$ , \*\*\*  $p < 0.001$ ).

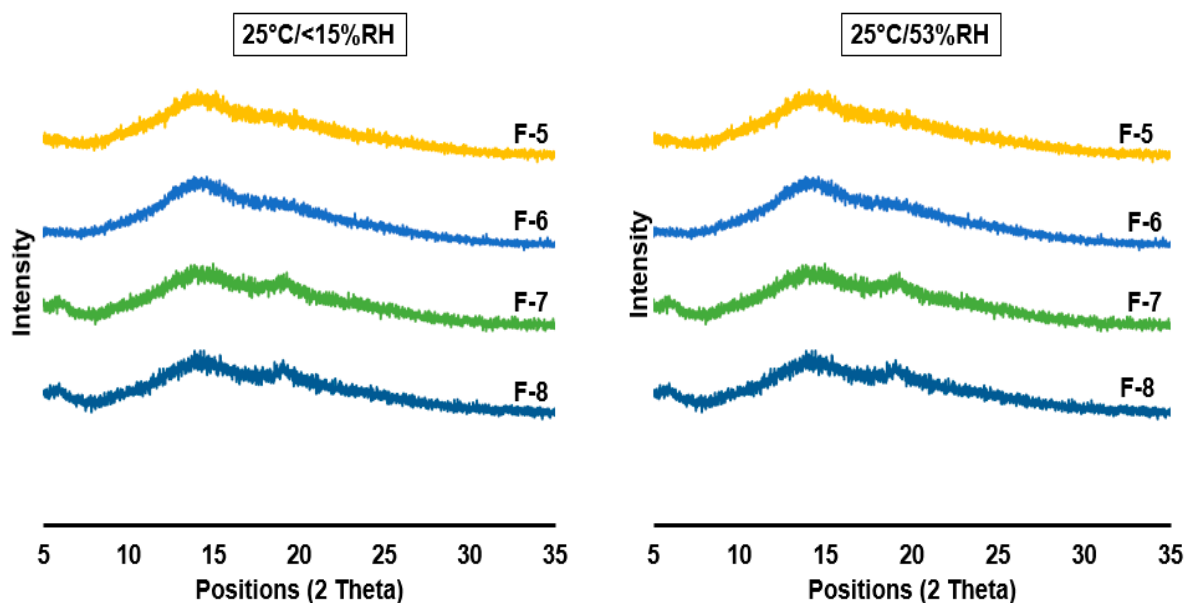

**Figure S5.** X-ray diffractograms of spray-dried formulations after 28 days stability study ( $25^{\circ}\text{C}/<15\%\text{RH}$  and  $25^{\circ}\text{C}/53\%\text{RH}$ ). The formulations were prepared at different conditions - (F-5) 0.2% (w/v) feed concentration,  $100^{\circ}\text{C}$  and 0% L-leucine (F-6) 0.8% (w/v) feed concentration,  $100^{\circ}\text{C}$  and 0% L-leucine (F-7) 0.2% (w/v) feed concentration,  $100^{\circ}\text{C}$  and 10% L-leucine (F-8) 0.8% (w/v) feed concentration,  $100^{\circ}\text{C}$  and 10% L-leucine. No peaks in the formulations indicating the amorphous nature.

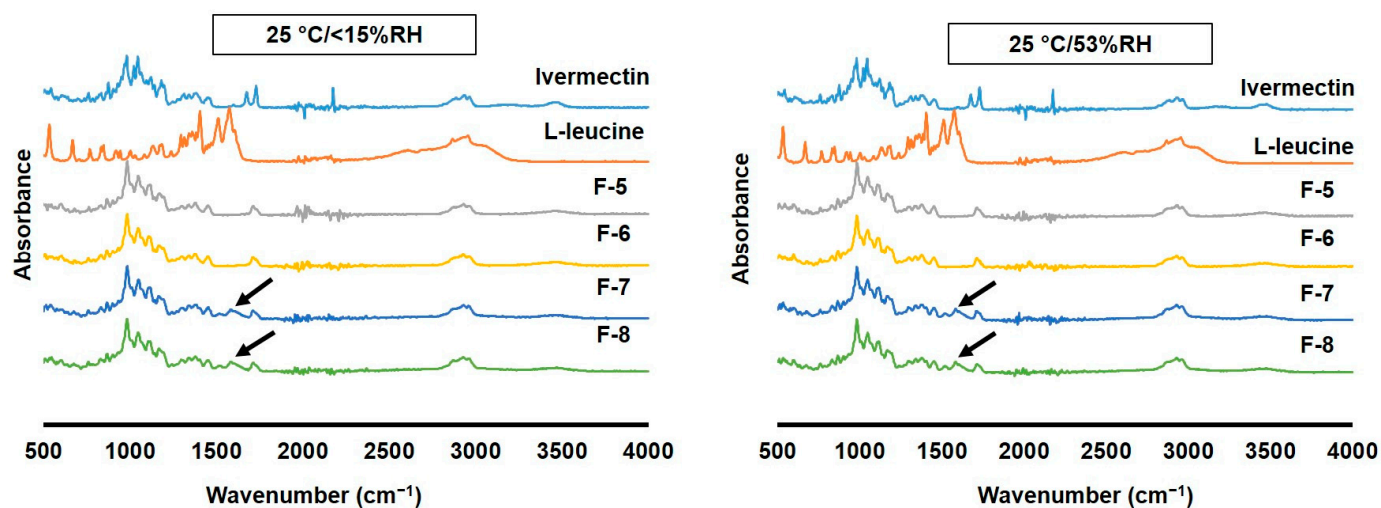

**Figure S6.** ATR-FTIR spectra of supplied ivermectin, L-leucine and spray dried formulations after 28 days stability study ( $25^{\circ}\text{C}/<15\%\text{RH}$  and  $25^{\circ}\text{C}/53\%\text{RH}$ ). The formulations were prepared at different conditions - (F-5) 0.2% (w/v) feed concentration,  $100^{\circ}\text{C}$  and 0% L-leucine (F-6) 0.8% (w/v) feed concentration,  $100^{\circ}\text{C}$  and 0% L-leucine (F-7) 0.2% (w/v) feed concentration,  $100^{\circ}\text{C}$  and 10% L-leucine (F-8) 0.8% (w/v) feed concentration,  $100^{\circ}\text{C}$  and 10% L-leucine. (Arrows indicating L-leucine peak).

**Table S1.** In vitro aerosolization behaviour of prepared ivermectin dry powder.

| Formulation | Loaded mass<br>(mg) | Mass recovery<br>(%) | FPD<br>(mg) | %ED        | %FPF       |
|-------------|---------------------|----------------------|-------------|------------|------------|
| F-1         | 18.3 ± 0.2          | 102.2 ± 2.9          | 10.3 ± 0.2  | 71.5 ± 0.7 | 76.3 ± 1.8 |
| F-2         | 18.2 ± 0.1          | 102.3 ± 0.2          | 11.3 ± 0.4  | 76.1 ± 4.4 | 79.9 ± 2.0 |
| F-3         | 19.9 ± 0.9          | 93.8 ± 0.6           | 10.8 ± 0.6  | 73.8 ± 2.2 | 77.9 ± 3.1 |
| F-4         | 19.8 ± 0.6          | 97.5 ± 1.2           | 12.1 ± 0.6  | 78.5 ± 1.3 | 80.2 ± 1.0 |
| F-5         | 19.4 ± 0.3          | 101.1 ± 3.5          | 11.3 ± 0.8  | 75.4 ± 1.1 | 75.4 ± 2.1 |
| F-6         | 18.9 ± 0.2          | 97.7 ± 1.1           | 11.9 ± 0.2  | 79.4 ± 1.3 | 80.2 ± 1.2 |
| F-7         | 18.1 ± 0.1          | 97.6 ± 0.9           | 10.2 ± 0.1  | 73.2 ± 0.3 | 78.1 ± 0.2 |
| F-8         | 19.5 ± 0.1          | 99.5 ± 1.4           | 12.4 ± 0.2  | 77.9 ± 0.5 | 82.5 ± 1.4 |

FPD = Fine particle dose, ED = Emitted dose, FPF = Fine particle fraction

**Table S2.** In vitro aerosolization behaviour of ivermectin dry powder after 28 days stability study (25°C/<15%RH and 25°C/53%RH).

| Formulation | 25 °C/<15% RH |            | 25 °C/<53% RH |            |
|-------------|---------------|------------|---------------|------------|
|             | % ED          | %FPF       | % ED          | %FPF       |
| F-5         | 75.6 ± 0.7    | 80.4 ± 2.2 | 75.0 ± 0.5    | 82.2 ± 0.7 |
| F-6         | 80.2 ± 0.4    | 85.5 ± 0.2 | 80.0 ± 1.5    | 86.6 ± 1.4 |
| F-7         | 74.5 ± 1.6    | 77.6 ± 2.1 | 73.4 ± 0.7    | 79.1 ± 3.7 |
| F-8         | 76.5 ± 1.0    | 83.6 ± 0.7 | 78.4 ± 1.2    | 86.9 ± 0.3 |

ED = Emitted dose, FPF = Fine particle fraction.

**Table S3.** The water content of ivermectin dry powder after 28 days stability study (25°C/<15%RH and 25°C/53%RH).

| Formulation | Water content |               |
|-------------|---------------|---------------|
|             | 25 °C/<15% RH | 25 °C/<53% RH |
| F-5         | 0.5 ± 0.1     | 0.6 ± 0.1     |
| F-6         | 0.4 ± 0.1     | 0.5 ± 0.1     |
| F-7         | 0.3 ± 0.1     | 0.5 ± 0.1     |
| F-8         | 0.4 ± 0.1     | 0.6 ± 0.1     |
